# Supplementary material for: Dual Blockage of P-cadherin and C-met Synergistically Inhibits the Growth of Head and Neck Cancer
Source: Preprints.org preprint supplement (doi:10.20944/preprints202310.1888.v1), 2023-10-30
Supplement: Supplementary file 2 [file L. Liu et al._supplementary figure legend.docx]

**Supplementary Figures Legend**

**Supplementary Figure1.**

(A) Cell lysates of SNU1041 and SNU1076 cell lines were immunoprecipitated with a c-Met antibody, and the immunoprecipitates were probed with c-Met and P-cadherin antibodies. (B) cell lysates were immunoprecipitated with a P-cadherin antibody, and the immunoprecipitates were probed with P-cadherin and c-Met antibodies.

**Supplementary Figure2.**

YD8 and SCC25 cells were transfected with P-cadherin siRNAs or negative control siRNA for 48h. (A, B) P-cadherin protein levels were assessed by western blot analysis. (C, D) Cell proliferation was analyzed using the WST-1 assay. (E, F) Cells were allowed to migrate for 48h in transwell chambers (Cell Migration) (G, H) P-cadherin protein levels were assessed by western blot analysis after P-cadherin overexpression vector was transiently transfected into YD8 and SCC25 cells. After P-cadherin overexpression, Cell proliferation was analyzed using the WST-1 assay (I, J) and cell migration assay was conducted (K, L). Data were presented as mean ± SD of three independent experiments. Differences were considered relevant at p < 0.05 (* p < 0.05, ** p < 0.01, *** p < 0.001).
